# Supplementary material for: Vildagliptin modulates the microbiota and induces an immunometabolic neuroprotective profile in type 2 diabetes
Source: Research Square preprint supplement (doi:10.21203/rs.3.rs-6596504/v1), 2025-05-30
Supplement: Supplementary file 1 [file 1c7b35f3fd43c6cf7ed09b1f.xlsx]

## Sheet: figure 1
Glucose			HbA1c			HOMA-IR
day 0	day 60		day 0	day 60		day 0	day 60
157	148		8	7.5		11.5	12.8
235	224		8.9	7.8		9	11.9
242	84		10.7	10.4		8.4	5
119	114		6.7	6.4		3.8	2.2
145	145		8.3	7.4		4.2	3.2
256	236		8.2	8.1		4.8	6.6
126	107		6.6	6.3		2.7	3.3
153	84		8.3	8.3		9.1	4.9
255	178		10.1	10.1		6.7	7
148	133		7.2	6.4		6.5	6.1
120	132		7	6.1		*	*
135	119		8.2	6.5		1.5	1.1
81	94		7.6	6.2		4.1	4.2
156	127		7.1	6		3.3	2.7
189	181		7.8	7.1		9.5	8.7
165	172		9.1	7.6		*	*
114	120		6.6	5.8		4.5	6.1
196	91		9	7.1		*	*
137	133		8.4	7.6		*	*
107	119		6.7	5.7		3	2
149	131		6.8	5.3		13.1	11.1
108	107		6.6	5.9		2.8	2.1
199	110		7.9	6.9		5.1	2.9
121	96		6.7	5.9		*	*
295	314		12.7	13.3		26.2	26.6
173	112		9.1	6.6		5.7	1.5
112	93		6.6	5.5		8.1	3.5
151	131		6.9	6.4		14.3	8.6
107	119		6.8	5.6		*	*
						* patients use insulin

## Sheet: Figure 2
Il-10			IL-4			MCP1			IFNg
day 0	day 60		day 0	day 60		day 0	day 60		day 0	day 60
0	0.14		1.89	4.84		1138.6	1125.3		5	9.3
0	0		1.57	3.43		586.7	657.3		21.4	14.9
1.67	2.46		3.43	4.92		1447	1201.1		68.2	49.3
7.91	9.85		2.97	4.92		1085	857.3		27	24.7
0	1.15		1.73	7.39		1066.9	927.6		7.2	11.7
0	0		2.43	5.94		1124.9	816.6		7.6	11.3
0	0		2.89	5.21		690.2	591.7		10.9	4.6
2.2	10.97		1.57	3.43		589.8	530.3		153	42.3
2.73	3.27		1.73	5.5		1400.2	1240.5		12.1	7.6
7.36	8.74		*	*		800.6	848.8		88.1	110.8
0.63	2.73		15.42	16.81		671.3	493.6		4.6	8
7.02	10.66		1.49	0.75		792.84	698.82		82.01	122.52
0	0.4		1.09	2.36		589.11	569		72.92	49.74
3.44	1.14		0.32	2.04		866.34	812.99		62.54	40.36
4.99	4.77		0.41	0.75		954.71	704.07		101.49	93.55
0	0		9.32	5.8		1153.11	968.39		20.85	17.17
0.1	0		0.75	1		675.74	731.06		76.76	71.02
0	0		2.2	2.04		552.84	593.19		133.93	114.43
1.15	1.15		*	*		1465.5	1818.6		11.3	20.3
0	0		*	*		765.17	812.89		64.06	69.04
0	0		*	*		501.49	515.07		96.17	89.17
0.4	0.93		*	*		474.33	533.38		74.68	60.47
1.79	3.99		*	*		437.07	432.13		69.59	56.7
0.89	1.15		*	*		1258.5	889		7.2	10.5
7.08	7.63		*	*		1233.7	1130.1		22.9	16.8
0	0.14		*	*		1174.3	1105.3		19.9	5.5
0	0		*	*		926.9	979.8		14.1	18.4
0.14	1.67		*	*		1021.7	1184.4		10.1	12.1
8.19	16.04		*	*		1725	1247.2		19.1	7.2
			* Sample not detected

## Sheet: Figure 3
leucine			2-Oxoisocaproate			Choline			Dimethylamine			Betaine			Aspartate			Inosine			Serine
day 0	day 60		day 0	day 60		day 0	day 60		day 0	day 60		day 0	day 60		day 0	day 60		day 0	day 60		day 0	day 60
1.03574	0.879119		1.45468	1.20069		1.39164	1.54627		0.542233	0.852081		1.08122	1.45913		2.4136	2.34837		0	0		1.10286	1.30782
0.857225	0.549028		1.08524	1.08524		0.682934	0.863331		0.968274	0.929543		0.741811	0.790798		0.489244	0.709403		2.24899	0.571776		0.744538	1.10286
0.916169	0.794912		0.785065	0.808155		0.914873	1.00507		0.697157	1.04574		0.867778	0.815292		0.684941	1.23942		3.08759	1.10543		1.32873	1.32455
0.963325	0.914485		0.600344	0.669614		0.773132	0.695819		0.658426	0.929543		1.45563	1.20719		0.277238	0.383241		1.8678	1.63909		0.875599	0.91185
1.04248	1.03069		0.969786	1.20069		0.876217	0.966415		0.81335	0.968274		0.591349	0.636837		0.26093	0.513706		2.32522	2.2871		0.783577	0.874205
0.698916	1.10479		1.03906	0.946696		1.03084	0.940644		0.81335	1.23939		1.03574	0.801295		0.472935	0.570784		2.24899	1.41038		0.731989	0.865839
0.95322	0.880803		1.36232	1.13142		1.18547	1.00507		1.007	0.735888		2.05398	1.31566		0.742019	1.07634		0.343066	0		0.487993	1.02757
0.894276	0.813437		0.831245	0.877426		0.670048	0.760247		0.890812	0.697157		0.521367	0.678827		0.489244	0.644171		1.60097	0.72425		0.715258	0.865839
0.971746	1.0088		0.900516	0.715795		0.734476	0.657162		0.852081	0.697157		0.958755	0.920265		0.56263	0.318008		0.95296	0.914842		0.658093	0.713864
1.48372	1.07953		1.22378	1.13142		0.940644	1.32721		0.852081	2.28513		0.895771	0.790798		1.84282	1.2068		0	0.190592		1.05964	1.20465
0.607973	0.57429		0.600344	0.531073		0.811789	0.901988		0.890812	1.16193		1.37865	1.52211		0.587092	0.587092		2.40146	2.05839		0.773817	0.907667
0.697232	0.552396		0.692704	0.646524		0.592735	0.850446		0.774619	1.16193		0.752308	1.50112		0.163081	0.432165		1.90592	2.02028		0.78776	0.91185
0.269462	0.734283		0.277082	0.507983		0.283482	0.811789		0.232386	1.08447		0.293925	0.962254		0.309854	0.212006		0	1.14355		0.448954	1.06522
0.564185	0.709021		*	1.09464		0.760247	0.940644		1.08447	1.1232		1.30167	1.86502		0.244622	0.432165		1.18167	1.63909		0.883964	0.992717
1.15532	0.488399		1.1776	0.669614		1.00507	0.773132		0.658426	0.658426		0.622841	0.657832		1.16603	0.399549		0.762368	1.0292		0.881176	0.695739
1.7515	1.20247		1.08524	0.900516		1.2499	1.41741		0.580964	1.31685		0.825789	1.39264		0.684941	0.546322		0	0.457421		1.16142	1.19489
1.22942	1.1789		0.900516	0.808155		0.72159	1.35298		0.542233	0.968274		0.734812	1.06723		0.693095	0.676787		2.13463	0.609895		0.89233	1.14051
1.92497	0.833647		2.37828	1.45468		1.14681	1.0695		1.16193	1.007		0.895771	0.878276		0.839868	0.684941		1.94404	1.82968		0.808674	0.698527
1.02564	1.02564		1.01597	0.854336		0.940644	1.90706		0.929543	0.852081		1.03923	1.1652		1.62266	1.94882		0.571776	0		1.47792	1.60201
0.843752	0.853856		0.461803	0.808155		0.889102	0.760247		1.39431	0.929543		0.808294	*		0.464781	0.709403		0.800487	0		1.167	0.918821
0.506925	1.05427		0.623434	1.13142		0.476765	1.49472		0.387309	1.58797		0.640337	1.63758		0.269084	0.954025		0.266829	0.95296		0.368086	0.945312
1.20921	0.931327		1.31614	1.06215		1.04373	0.979301		0.658426	1.16193		1.10922	1.20369		0.546322	0.52186		1.67721	2.24899		0.769635	0.856079
1.00206	0.860593		0.808155	0.785065		0.618506	0.786018		0.658426	1.04574		0.804795	0.916766		0.472935	0.56263		1.21979	0		0.907667	1.03873
1.15868	0.914485		1.20069	0.923606		1.32721	1.32721		0.735888	1.08447		0.867778	0.839786		1.8999	2.10375		0	0		1.10705	1.31479
1.02227	1.04753		1.1776	1.36232		1.22413	2.10034		0.697157	0.929543		1.70057	1.71456		1.62266	1.99775		0	0		1.61316	1.84601
1.61172	1.55951		2.07811	1.77794		1.17258	1.55915		0.619695	2.40132		0.808294	1.28417		1.36988	2.17713		1.18167	0.304947		1.24647	1.72471
1.1469	1.01048		1.50086	1.33923		0.966415	1.4303		0.619695	1.16193		0.643836	1.00424		2.29944	2.56038		0	0		1.23114	1.30922
1.3052	0.966694		1.54704	1.06215		1.17258	1.17258		0.542233	2.94355		0.843285	0.7838		1.54112	1.27203		0.533658	0		1.13772	1.13772
1.17721	0.783123		1.08524	0.831245		0.940644	1.12104		0.580964	2.28513		1.00074	0.790798		1.66343	2.15267		1.18167	0.381184		1.05964	1.03733
							* Sample not detected

## Sheet: Figure 4
The 16S rRNA sequence dataset has been deposited in the BioProject repository (PRJNA1219131).

## Sheet: Figure 5
Graphical Abstract

## Sheet: Table 1
SEX	Age - yr	Medication use at presentation			Weight (Kg)		BMI
F	54	Metformin			69	72	28.75	29.96
F	67	Metformin	statin or other lipid-lowering agent	Losartan or others antihypertensiveagents	83	83	32.04	32.04
F	50	Metformin	statin or other lipid-lowering agent		65	64.5	26.7	26.5
M	61	Metformin	statin or other lipid-lowering agent	Losartan or others antihypertensiveagents	80	79	29.35	29.37
M	54	Metformin	statin or other lipid-lowering agent	Losartan or others antihypertensiveagents	75.9	74	28.96	28.19
F	46	Metformin	statin or other lipid-lowering agent	Losartan or others antihypertensiveagents	76.4	76	33.9	33.77
M	48	Metformin			84.2	86	32.13	32.76
F	70	Metformin	statin or other lipid-lowering agent		86	86	34.75	34.73
F	64	Metformin	statin or other lipid-lowering agent	Losartan or others antihypertensiveagents	84.5	86	34.77	35.33
M	35	Metformin			81	81.9	28.36	28.67
F	66	Metformin	statin or other lipid-lowering agent	Losartan or others antihypertensiveagents	79	80.5	29.7	30.29
F	54	Metformin	statin or other lipid-lowering agent		79	79	33.74	33.74
M	63	Metformin	statin or other lipid-lowering agent	Losartan or others antihypertensiveagents	72	70	26.44	25.71
M	55	Metformin			82	80	26.77	26.12
M	50	Metformin		Losartan or others antihypertensiveagents	73	71	25.25	24.56
F	58	Metformin	statin or other lipid-lowering agent	Losartan or others antihypertensiveagents	97	97	34.78	34.78
F	68	Metformin		Losartan or others antihypertensiveagents	65	64	26.03	25.63
F	58	Metformin		Losartan or others antihypertensiveagents	58.5	59	26	26.22
F	58	Metformin			62	62	25.8	25.8
F	69	Metformin			66.5	66	26.97	26.77
F	57	Metformin	statin or other lipid-lowering agent	Losartan or others antihypertensiveagents	61.5	60.5	28.07	37.6
F	50	Metformin	statin or other lipid-lowering agent	Losartan or others antihypertensiveagents	76.2	74	32.13	31.2
F	62	Metformin	statin or other lipid-lowering agent		68	66.5	28.3	27.67
F	59	Metformin		Losartan or others antihypertensiveagents	86.5	86	33.78	33.59
M	32	Metformin	statin or other lipid-lowering agent	Losartan or others antihypertensiveagents	86	92	27.76	29.7
F	58	Metformin			73	68	30.38	28.3
F	41	Metformin		Losartan or others antihypertensiveagents	107	108	34.93	35.26
M	70	Metformin	statin or other lipid-lowering agent	Losartan or others antihypertensiveagents	81.5	84	24.06	28.06
F	52	Metformin			66.2	67	25.97	26.17
